# Supplementary material for: Engineering insect flight metabolics using immature stage implanted microfluidics
Source: Royal Society of Chemistry journal article supplement (doi:10.1039/b814911a), 2008-11-24
Supplement: b814911a.pdf [file b814911a.pdf]

**Supplemental Material**  
“Engineering insect flight metabolics using immature stage implanted microfluidics”  
Aram J. Chung and David Erickson

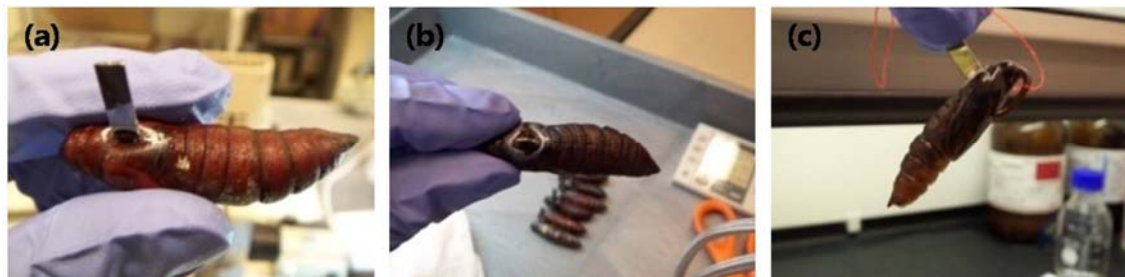

**Fig.S1** Implantation examples for different inserting timing (a) 8 days prior to emerge (b) 4 days prior to emerge (c) 1 day prior to emerge

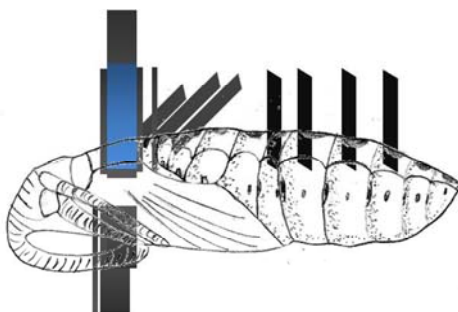

**Fig.S2** A schematic view of the implantation locations that were tested to find the optimal location. Blue rectangular represents the optimal device insertion site.

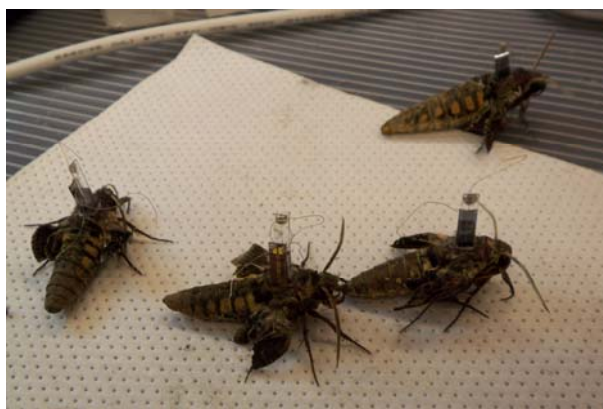

**Fig.S3** Examples of zero flight-capable insects owing to malformed wings
